# Supplementary material for: Monolithic green-sensitive photodetectors enabled by a ZnSnN 2 /GaN nanorods/silicon double heterojunction
Source: Royal Society of Chemistry journal article supplement (doi:10.1039/d4qi02418d), 2025-01-01
Supplement: d4qi02418d1.pdf [file d4qi02418d1.pdf]

SEM Top view

Graphical analysis result

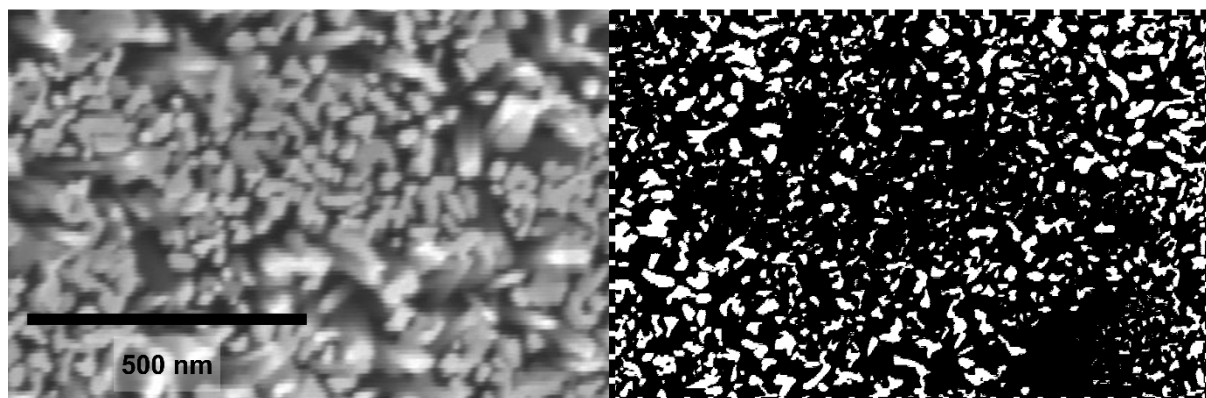

**Figure S1.** SEM image of GaN NRs

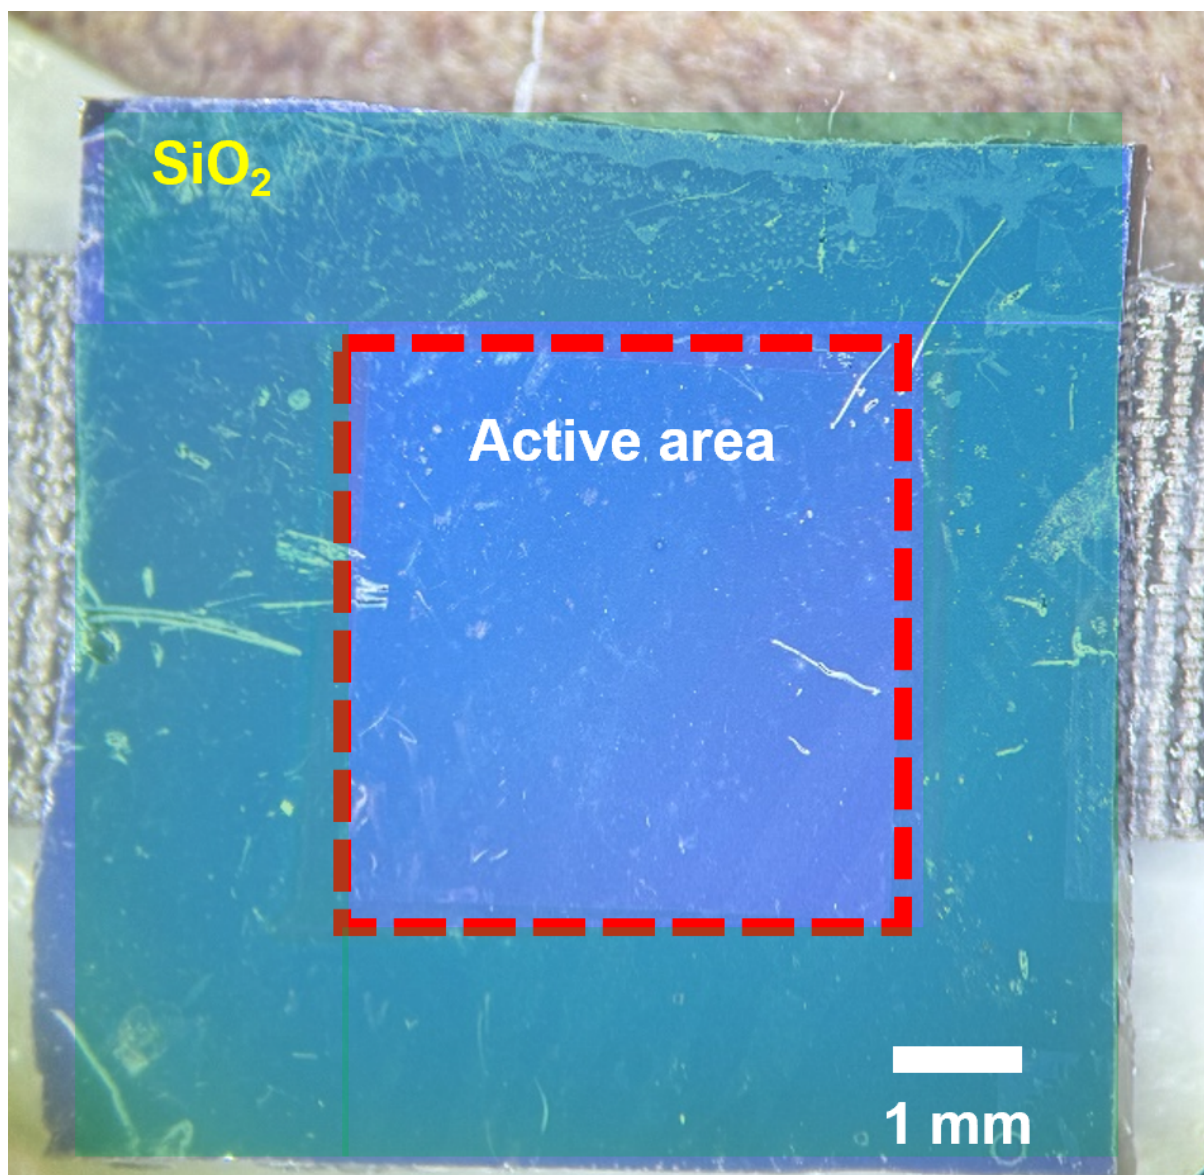

**Figure S2** Photograph of the fabricated SH-PD.

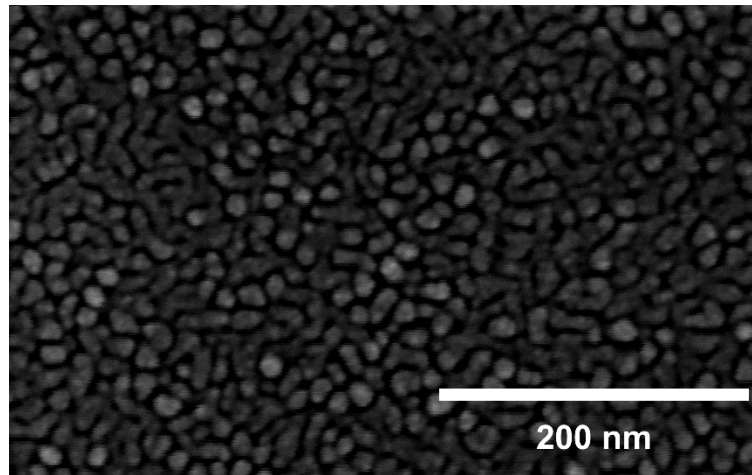

**Figure S3** FE-SEM image of ZTN thin film

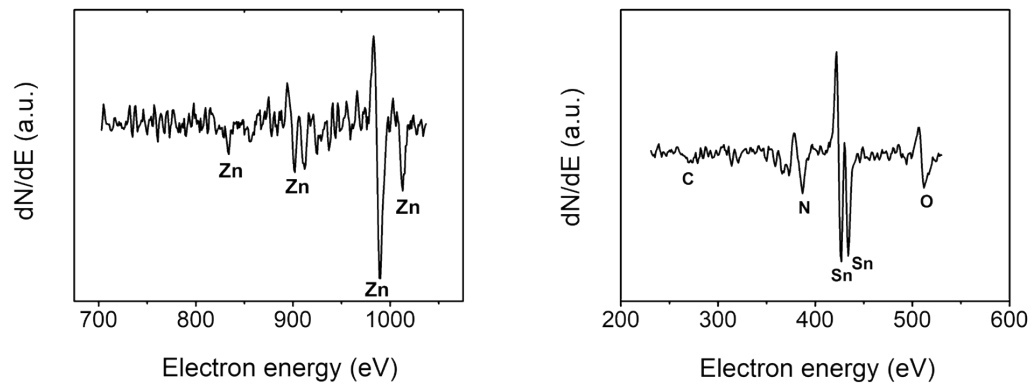

**Figure S4** AES results of ZTN thin film

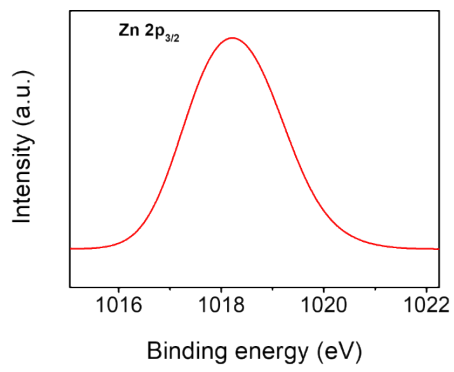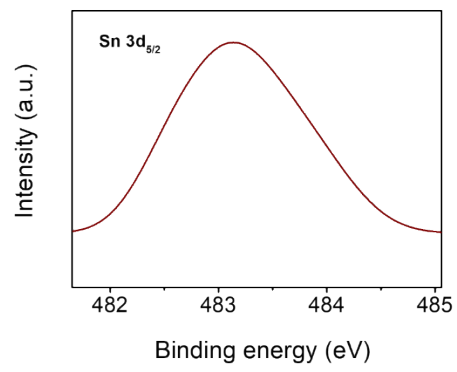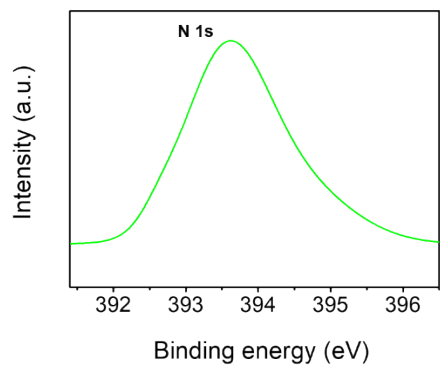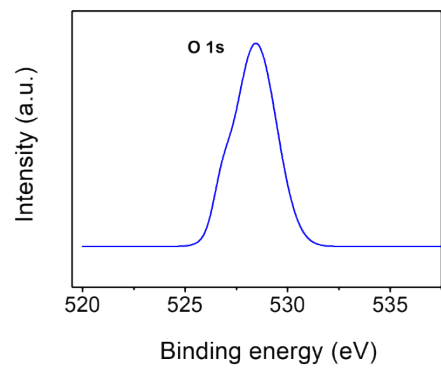

**Figure S5** XPS results of ZTN thin film

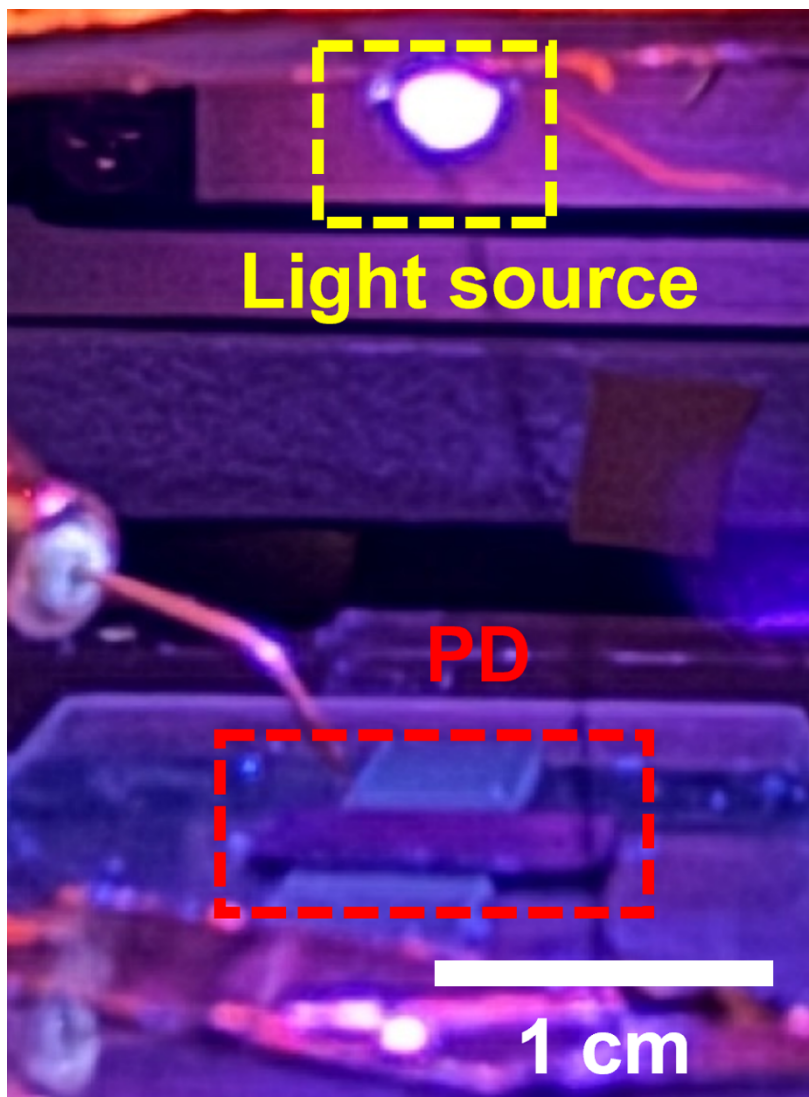

**Figure S6** Experimental set-up for measuring optical/electrical properties of the devices.

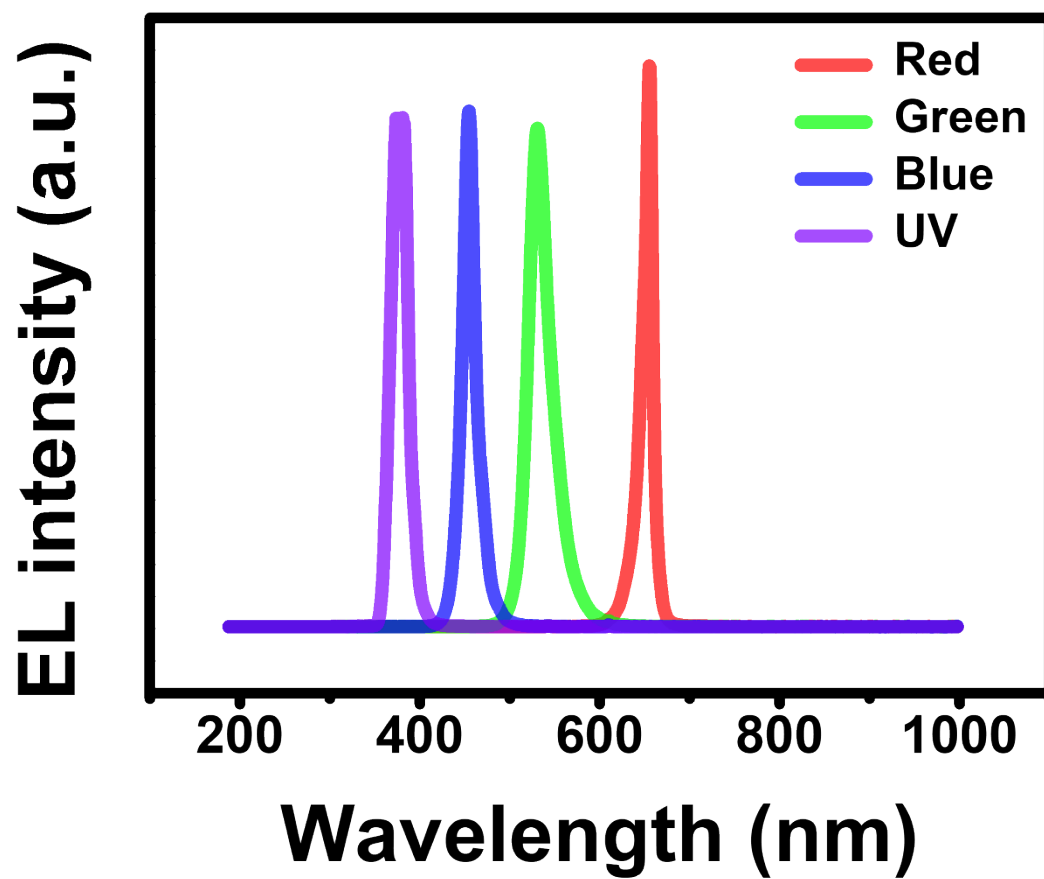

Figure S7 EL spectrum of the conventional light sources (UV, blue, green and red light).

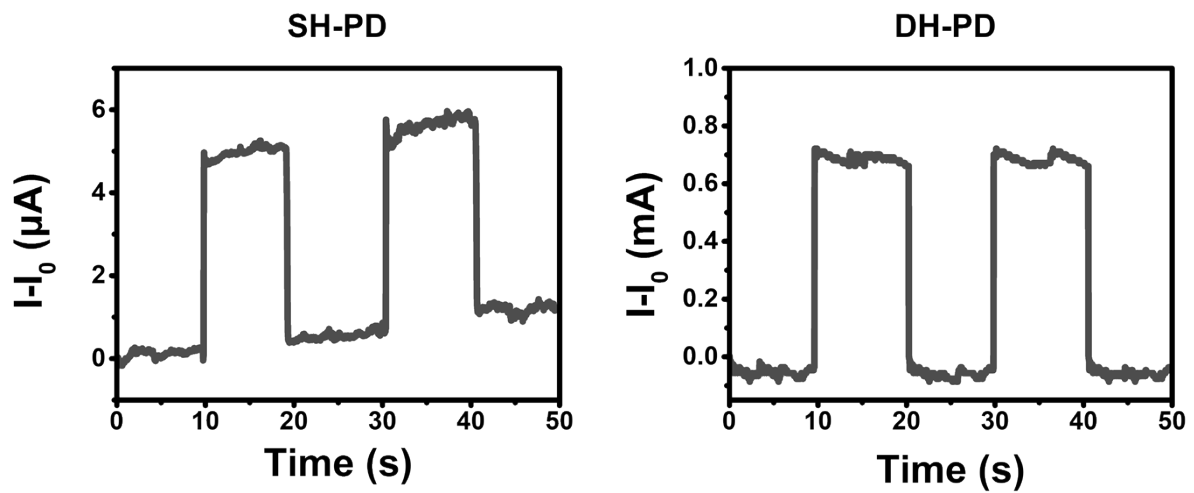

Figure S8 Operation testing results of SH-PD (left) and DH-PD (right)



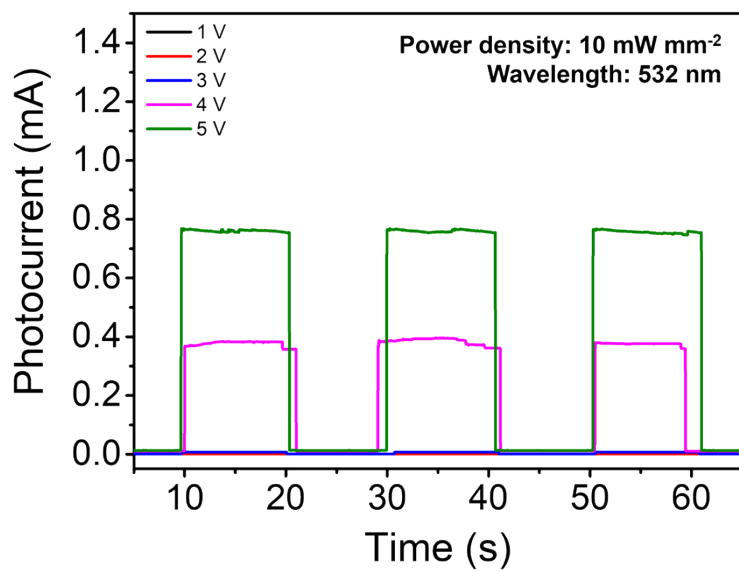

**Figure S9** Voltage-dependent device operation test

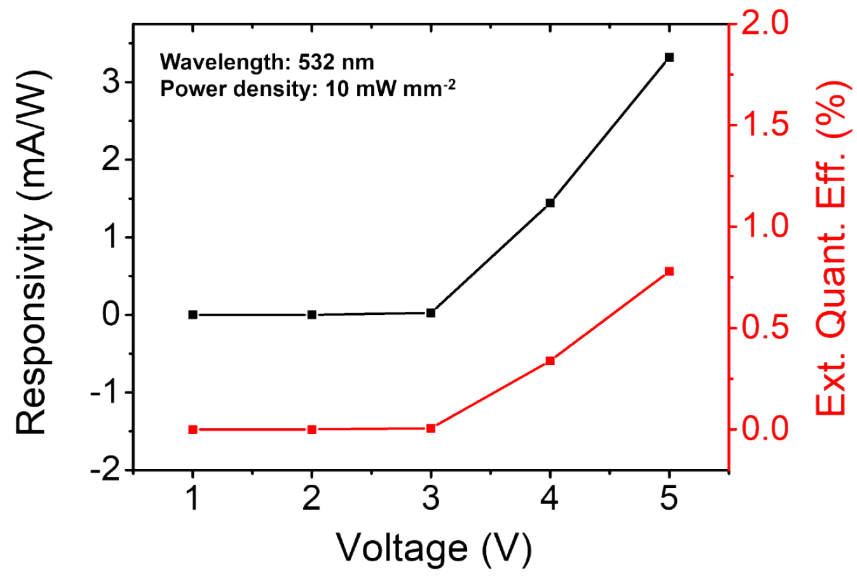

**Figure S10** R and EQE value of voltage-dependent on/off test

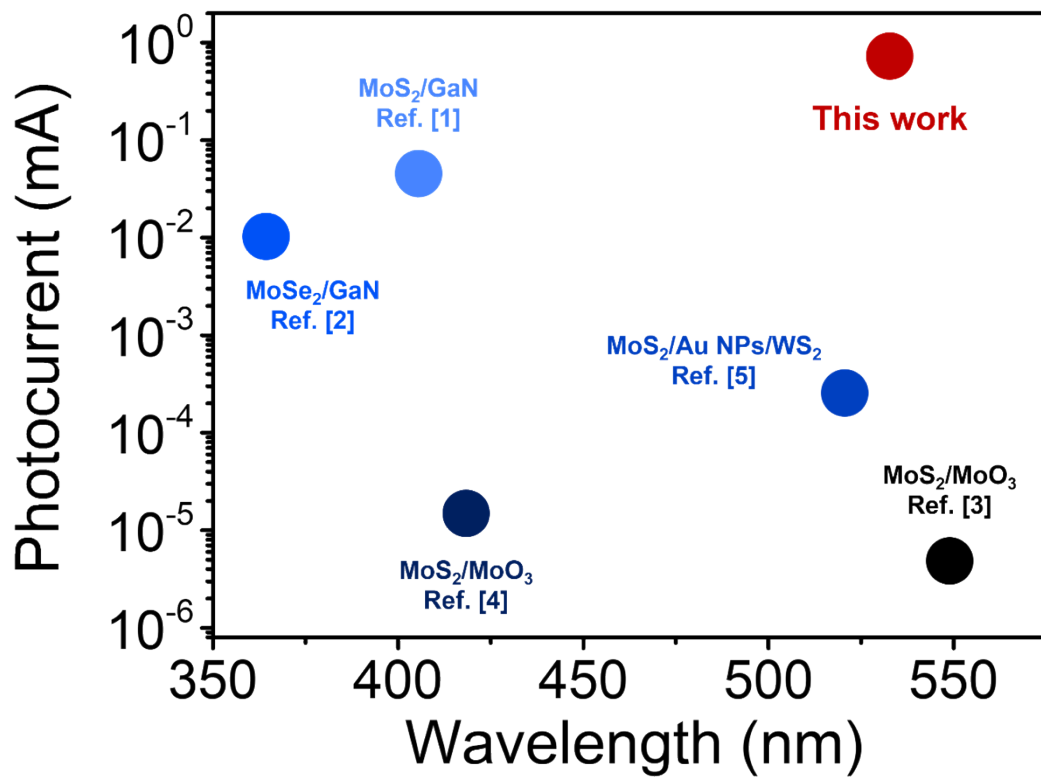

Figure S11. The performance comparison result of reported heterojunction-based PDs

|                      | thickness<br>[nm] | Bulk concentration<br>$N_b$ [ $\text{cm}^{-3}$ ] | Mobility<br>$\mu$ [ $\text{cm}^2 \text{V}^{-1} \text{s}^{-1}$ ] |
|----------------------|-------------------|--------------------------------------------------|-----------------------------------------------------------------|
| <b>ZTN thin film</b> | 242.1             | -2.39E+19                                        | 1.33E+01                                                        |

**Table S1** Bulk carrier concentration and mobility of ZTN thin-film

| Voltage | Photocurrent  | Dark current  | Responsivity    | EQE                     |
|---------|---------------|---------------|-----------------|-------------------------|
| 1 V     | 0.504 $\mu$ A | 0.315 $\mu$ A | 0.759 $\mu$ A/W | $1.78 \times 10^{-4}$ % |
| 2 V     | 1.020 $\mu$ A | 0.572 $\mu$ A | 1.81 $\mu$ A/W  | $4.25 \times 10^{-4}$ % |
| 3 V     | 7.341 $\mu$ A | 1.000 $\mu$ A | 25.3 $\mu$ A/W  | $5.95 \times 10^{-3}$ % |
| 4 V     | 37.14 $\mu$ A | 10.81 $\mu$ A | 1.44 mA/W       | $3.38 \times 10^{-1}$ % |
| 5 V     | 733.7 $\mu$ A | 13.46 $\mu$ A | 3.32 mA/W       | $7.79 \times 10^{-1}$ % |

**Table S2** Summary of voltage-dependent on/off test

| Material                                 | Photocurrent | Dark current | Wavelength | $\Delta I$   | Ref       |
|------------------------------------------|--------------|--------------|------------|--------------|-----------|
| MoS <sub>2</sub> /GaN                    | 40.5 $\mu$ A | 0.2 $\mu$ A  | 405 nm     | 40.3 $\mu$ A | [1]       |
| MoSe <sub>2</sub> /GaN                   | 10.5 $\mu$ A | 0.95 $\mu$ A | 365 nm     | 9.55 $\mu$ A | [2]       |
| MoS <sub>2</sub> /MoO <sub>3</sub>       | 4.7 nA       | 1.3 pA       | 550 nm     | 4.7 nA       | [3]       |
| MoS <sub>2</sub> /MoO <sub>3</sub>       | 15.56 nA     | 6 pA         | 420 nm     | 15.56 nA     | [4]       |
| MoS <sub>2</sub> /Au NPs/WS <sub>2</sub> | 230 nA       | 1.1 pA       | 520 nm     | 230 nA       | [5]       |
| ZTN/GaN/Si                               | 733 $\mu$ A  | 13 $\mu$ A   | 532 nm     | 720 $\mu$ A  | This work |

**Table S3** The photocurrent, dark current and wavelength comparison result of reported heterojunction-based PDs

- 1 M. Moun, M. Kumar, M. Garg, R. Pathak, and R. Singh, Understanding of MoS<sub>2</sub>/GaN Heterojunction Diode and its Photodetection Properties, *Sci. Rep.*, 2018, **8**, 11799.
- 2 H. K. Sandhu, J. W. John, A. Jakhar, A. Sharma, A. Jain, and S. Das, MoSe<sub>2</sub>/n-GaN Heterojunction Induced High Photoconductive Gain for Low-Noise Broadband Photodetection from Ultraviolet to Near-Infrared Wavelengths, *Adv. Mater. Interfaces.*, 2022, **9**, 2102200.
- 3 H. Li, T. Zhang, Z. Yi, X. Chen, Z. Dai, and J. Tan, High Sensitive and Stable UV–Vis Photodetector Based on MoS<sub>2</sub>/MoO<sub>3</sub> vdW Heterojunction, *ACS Appl. Mater. Interfaces*, 2024, **16**, 33829-33837.
- 4 R. Singh, M. Kumar, U. Kim, and H. Seo, Self-Powered and High-Performance Alternating Current Photodetectors to enhance Broadband Photodetection, *Adv. Electron. Mater.*, 2022, **8**, 2200392.
- 5 Z. Lin, P. Luo, W. Zeng, H. Lai, W. Xie, W. Deng, and Z. Luo, Improvement of photoelectric properties of MoS<sub>2</sub>/WS<sub>2</sub> heterostructure photodetector with interlayer of Au nanoparticles, *Opt. Mater.*, 2020, **108**, 110191.
